# Supplementary material for: Anti-obesity effects of Laminaria japonica fucoidan in high-fat diet-fed mice vary with the gut microbiota structure
Source: Royal Society of Chemistry journal article supplement (doi:10.1039/d2fo00480a), 2022-01-01
Supplement: d2fo00480a1.pdf [file d2fo00480a1.pdf]

## **Anti-obesity effects of *Laminaria japonica* fucoidan in high-fat diet-fed mice vary with gut microbiota structure**

Xueqian Zhang<sup>a,b</sup>, Ying You<sup>a</sup>, LiLong Wang<sup>a</sup>, Chunqing Ai<sup>a,c</sup>, Linjuan Huang<sup>b,d</sup>,  
Songtao Wang<sup>e</sup>, Zhongfu Wang<sup>b,d,\*</sup>, Shuang Song<sup>a,c,\*</sup>, Beiwei Zhu<sup>a,c</sup>

<sup>a</sup> National Engineering Research Center of Seafood, School of Food Science and Technology, Dalian Polytechnic University, Dalian 116034, China

<sup>b</sup> College of Food Science and Technology, Northwest University, Xi'an 710069, China

<sup>c</sup> National & Local Joint Engineering Laboratory for Marine Bioactive Polysaccharide Development and Application, Dalian Polytechnic University, Dalian 116034, China

<sup>d</sup> Shaanxi Natural Carbohydrate Resource Engineering Research Center, College of Food Science and Technology, Northwest University, Xi'an 710069, China

<sup>e</sup> National Engineering Research Center of Solid-State Brewing, Luzhou Pinchuang Technology Company Limited, Luzhou, 646000, China

\* Corresponding author at: College of Food Science and Technology, Northwest University, Xi'an 710069, China (Zhongfu Wang), School of Food Science and Technology, Dalian Polytechnic University, Dalian 116034, China (Shuang Song).

E-mail addresses: wangzhf@nwu.edu.cn (Zhongfu Wang), songs1008@163.com (Shuang Song).

**Table S1.** Compositions of experimental diets.

| Ingredients   | Normal chow diet | High fat diet |
|---------------|------------------|---------------|
| Crude fiber   | 4.90%            | 1.60%         |
| Crude protein | 20.18%           | 19.50%        |
| Crude fat     | 4.60%            | 17.20%        |
| Crude ash     | 6.60%            | 4.00%         |
| Moisture      | 10.00%           | 8.80%         |
| Calcium       | 1.14%            | 1.20%         |
| Phosphorus    | 0.91%            | 0.82%         |

**Feed ingredients:** corn, soybean meal, wheat bran, wheat flour, fish meal, salt, calcium bicarbonate, vitamin mix, mineral mix, amino acid, etc.

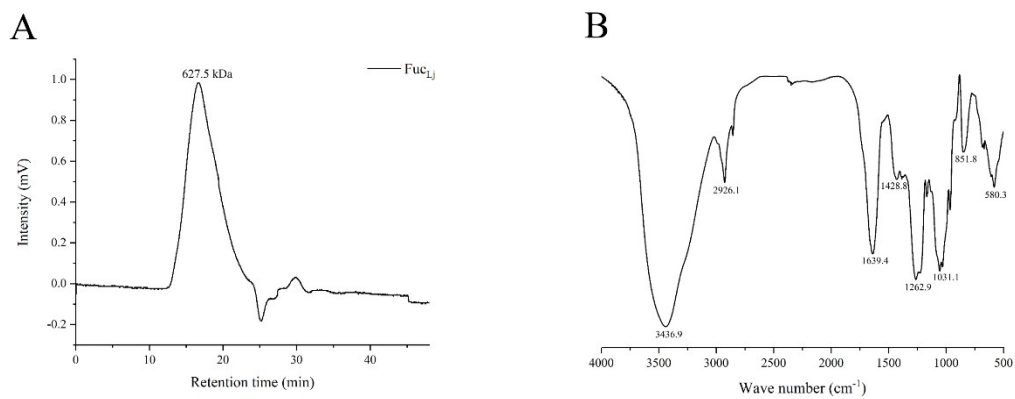

**Fig. S1** Chemical characterization of Fuc<sub>Lj</sub>: (A) average molecular weight of Fuc<sub>Lj</sub>, (B) FT-IR spectra of Fuc<sub>Lj</sub>.

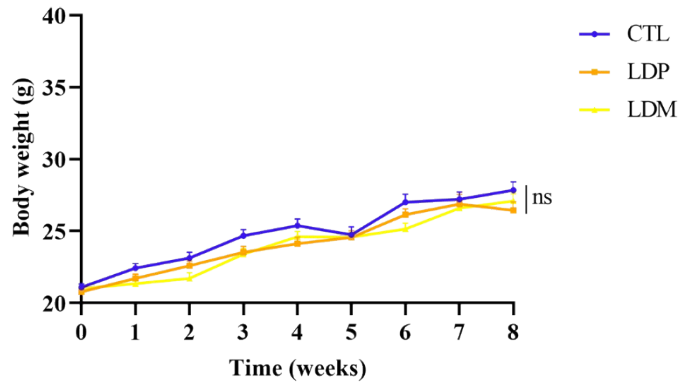

**Fig. S2** Body weight of mice before high-fat diet treatment. ns: no significant difference.
